# Supplementary material for: Species and genotype diversity of Plasmodium in malaria patients from Gabon analysed by next generation sequencing
Source: Springer Nature journal article supplement (doi:10.1186/s12936-017-2044-0), 2017-10-03
Supplement: MOESM1 [file 15101232]

| Sample ID | <i>P. falciparum</i> |       |      |      | <i>P. malariae</i> |      |      | <i>P. ovale curtisi</i> |      |      | <i>P. ovale wallikeri</i> |      |      | Coverage |
|-----------|----------------------|-------|------|------|--------------------|------|------|-------------------------|------|------|---------------------------|------|------|----------|
|           | 18S A                | 18S S | cytb | clpc | 18S                | cytb | clpc | 18S                     | cytb | clpc | 18S                       | cytb | clpc |          |
| MID01     | 0                    | 0     | 0    | 0    | 270                | 539  | 79   | 0                       | 0    | 0    | 0                         | 0    | 0    | 888      |
| MID02     | 263                  | 40    | 313  | 252  | 0                  | 0    | 0    | 0                       | 0    | 0    | 0                         | 0    | 0    | 868      |
| MID03     | 547                  | 94    | 589  | 230  | 0                  | 0    | 0    | 0                       | 0    | 0    | 0                         | 0    | 0    | 1460     |
| MID04     | 313                  | 96    | 814  | 291  | 0                  | 0    | 0    | 0                       | 0    | 0    | 0                         | 0    | 0    | 1514     |
| MID05     | 470                  | 10    | 569  | 272  | 0                  | 0    | 0    | 0                       | 0    | 0    | 0                         | 0    | 0    | 1321     |
| MID06     | 324                  | 80    | 602  | 269  | 0                  | 0    | 0    | 0                       | 0    | 0    | 0                         | 0    | 0    | 1275     |
| MID07     | 184                  | 162   | 180  | 129  | 0                  | 0    | 0    | 0                       | 0    | 0    | 0                         | 0    | 0    | 655      |
| MID08     | 0                    | 0     | 266  | 699  | 0                  | 0    | 0    | 0                       | 0    | 0    | 0                         | 0    | 0    | 965      |
| MID09     | 390                  | 423   | 611  | 679  | 0                  | 0    | 0    | 0                       | 0    | 0    | 0                         | 0    | 0    | 2103     |
| MID10     | 403                  | 398   | 572  | 749  | 0                  | 0    | 0    | 0                       | 0    | 0    | 0                         | 0    | 0    | 2122     |
| MID11     | 29                   | 38    | 32   | 93   | 761                | 402  | 491  | 0                       | 0    | 0    | 0                         | 0    | 0    | 1846     |
| MID12     | 6309                 | 425   | 679  | 645  | 0                  | 0    | 0    | 0                       | 0    | 0    | 0                         | 0    | 0    | 8058     |
| MID13     | 326                  | 497   | 869  | 702  | 0                  | 0    | 0    | 0                       | 0    | 0    | 0                         | 0    | 0    | 2394     |
| MID14     | 278                  | 213   | 918  | 704  | 0                  | 0    | 0    | 0                       | 0    | 0    | 0                         | 0    | 0    | 2113     |
| MID15     | 221                  | 298   | 717  | 2121 | 0                  | 0    | 0    | 0                       | 0    | 0    | 0                         | 0    | 0    | 3357     |
| MID16     | 266                  | 84    | 47   | 651  | 84                 | 0    | 32   | 0                       | 0    | 43   | 19                        | 0    | 0    | 1226     |
| MID17     | 211                  | 567   | 683  | 1241 | 0                  | 0    | 0    | 0                       | 0    | 0    | 0                         | 0    | 0    | 2702     |
| MID18     | 164                  | 209   | 623  | 4293 | 0                  | 0    | 0    | 0                       | 0    | 0    | 0                         | 0    | 0    | 5289     |
| MID19     | 314                  | 992   | 706  | 1240 | 0                  | 0    | 0    | 0                       | 0    | 0    | 0                         | 0    | 0    | 3252     |
| MID20     | 81                   | 460   | 589  | 543  | 0                  | 0    | 0    | 0                       | 0    | 0    | 0                         | 0    | 0    | 1673     |
| MID21     | 400                  | 245   | 763  | 375  | 0                  | 0    | 0    | 0                       | 0    | 0    | 0                         | 0    | 0    | 1783     |
| MID22     | 396                  | 312   | 807  | 704  | 0                  | 0    | 0    | 0                       | 0    | 0    | 0                         | 0    | 0    | 2219     |
| MID23     | 739                  | 223   | 306  | 2226 | 0                  | 0    | 0    | 4                       | 0    | 13   | 2363                      | 2628 | 0    | 8502     |
| MID24     | 329                  | 347   | 67   | 218  | 0                  | 0    | 0    | 1653                    | 2316 | 2007 | 0                         | 0    | 0    | 6937     |
| MID25     | 2192                 | 1675  | 2256 | 1847 | 91                 | 0    | 0    | 0                       | 0    | 0    | 0                         | 0    | 0    | 8061     |
| MID26     | 1244                 | 1151  | 2924 | 2895 | 0                  | 0    | 0    | 0                       | 0    | 0    | 0                         | 0    | 0    | 8214     |
| MID27     | 145                  | 237   | 23   | 163  | 3006               | 2002 | 1682 | 0                       | 0    | 0    | 0                         | 0    | 0    | 7258     |
| MID28     | 1213                 | 636   | 269  | 2180 | 759                | 1489 | 291  | 28                      | 445  | 0    | 10                        | 10   | 0    | 7330     |
| MID29     | 253                  | 505   | 18   | 273  | 3402               | 2323 | 1910 | 120                     | 0    | 0    | 287                       | 0    | 0    | 9091     |
| MID30     | 2177                 | 1645  | 2046 | 3070 | 0                  | 0    | 28   | 0                       | 0    | 0    | 26                        | 0    | 0    | 8992     |
| MID31     | 198                  | 104   | 49   | 0    | 0                  | 0    | 0    | 939                     | 856  | 1486 | 0                         | 0    | 0    | 3632     |
| MID32     | 27                   | 0     | 0    | 1604 | 0                  | 0    | 0    | 0                       | 0    | 0    | 678                       | 124  | 8    | 2441     |
| MID33     | 28                   | 0     | 0    | 0    | 673                | 0    | 1249 | 0                       | 0    | 0    | 0                         | 0    | 0    | 1950     |
| MID34     | 585                  | 220   | 373  | 1576 | 100                | 383  | 0    | 0                       | 0    | 0    | 0                         | 0    | 0    | 3237     |
| MID35     | 547                  | 116   | 86   | 1996 | 562                | 673  | 44   | 0                       | 0    | 0    | 0                         | 0    | 0    | 4024     |
| MID36     | 821                  | 132   | 693  | 1970 | 0                  | 0    | 0    | 0                       | 0    | 0    | 0                         | 0    | 0    | 3616     |
| MID37     | 1389                 | 241   | 1181 | 1442 | 0                  | 0    | 0    | 0                       | 3    | 3    | 0                         | 0    | 0    | 4259     |
| MID38     | 759                  | 423   | 511  | 1166 | 0                  | 0    | 0    | 0                       | 0    | 0    | 22                        | 21   | 0    | 2902     |
| MID39     | 490                  | 316   | 843  | 1736 | 0                  | 0    | 0    | 0                       | 0    | 0    | 0                         | 0    | 0    | 3385     |
| MID40     | 329                  | 26    | 241  | 2234 | 402                | 539  | 0    | 0                       | 0    | 0    | 0                         | 0    | 0    | 3771     |
| MID41     | 343                  | 38    | 871  | 1577 | 15                 | 81   | 0    | 0                       | 0    | 0    | 0                         | 0    | 0    | 2925     |
| MID42     | 495                  | 69    | 631  | 1581 | 84                 | 233  | 0    | 0                       | 0    | 0    | 0                         | 0    | 0    | 3093     |
| MID43     | 829                  | 121   | 859  | 3278 | 10                 | 6    | 0    | 0                       | 0    | 0    | 0                         | 0    | 0    | 5103     |
| MID44     | 864                  | 41    | 749  | 2206 | 0                  | 0    | 0    | 0                       | 0    | 0    | 0                         | 0    | 0    | 3860     |
| MID45     | 944                  | 120   | 179  | 2012 | 0                  | 0    | 0    | 0                       | 0    | 0    | 0                         | 0    | 0    | 3255     |
| MID46     | 0                    | 0     | 0    | 0    | 0                  | 0    | 0    | 0                       | 0    | 0    | 718                       | 655  | 1992 | 3365     |
